# Supplementary material for: Mössbauer isomer shifts and effective contact densities obtained by the exact two-component (X2C) relativistic method and its local variants
Source: Royal Society of Chemistry journal article supplement (doi:10.1039/d0cp04549g), 2020-01-01
Supplement: d0cp04549g1.pdf [file d0cp04549g1.pdf]

## Supporting Information:

# Mössbauer isomer shifts and effective contact densities obtained by the exact two-component (X2C) relativistic method and its local variants

Hong Zhu, Chun Gao, Michael Filatov, and Wenli Zou

November 3, 2020

## Contents

|   |                                                             |   |
|---|-------------------------------------------------------------|---|
| 1 | The X2C Hamiltonian and its first-order derivatives         | 2 |
| 2 | Effective contact density and contact density               | 3 |
| 3 | One-particle density matrices of advanced ab initio methods | 5 |
| 4 | Atomic density radial distributions of core orbitals        | 6 |
| 5 | Results for $^{57}\text{Fe}$                                | 7 |
| 6 | Radical density distributions of Hg                         | 8 |
| 7 | About the RelED program                                     | 9 |

## 1 The X2C Hamiltonian and its first-order derivatives

Starting from the four-component (4c) Dirac equation with embedded restricted kinetic balance, a matrix equation for the electronic (positive-energy) solutions was obtained by Dyall [J. Chem. Phys. 106, 9618, 1997],

$$\begin{pmatrix} \mathbf{V} & \mathbf{T} \\ \mathbf{T} & \mathbf{W} - \mathbf{T} \end{pmatrix} \begin{pmatrix} \mathbf{A}_+ \\ \mathbf{B}_+ \end{pmatrix} = \begin{pmatrix} \mathbf{S} & \mathbf{0} \\ \mathbf{0} & \frac{1}{2c^2} \mathbf{T} \end{pmatrix} \begin{pmatrix} \mathbf{A}_+ \\ \mathbf{B}_+ \end{pmatrix} \varepsilon_+ . \quad (\text{S1})$$

By eliminating the small-component of the electronic wavefunction through

$$\mathbf{B}_+ = \mathbf{X} \mathbf{A}_+ , \quad (\text{S2})$$

where  $\mathbf{X}$  is the matrix representation of the relativistic transformation operator, Eq. (S1) can be simplified to

$$\tilde{\mathbf{L}} \mathbf{A}_+ = \tilde{\mathbf{S}} \mathbf{A}_+ \varepsilon_+ \quad (\text{S3})$$

with

$$\tilde{\mathbf{L}} = \mathbf{X}^\dagger \mathbf{T} + \mathbf{T} \mathbf{X} - \mathbf{X}^\dagger (\mathbf{T} - \mathbf{W}) \mathbf{X} + \mathbf{V} , \quad (\text{S4})$$

$$\tilde{\mathbf{S}} = \mathbf{S} + \frac{1}{2c^2} \mathbf{X}^\dagger \mathbf{T} \mathbf{X} , \quad (\text{S5})$$

where  $\mathbf{S}$ ,  $\mathbf{T}$ , and  $\mathbf{V}$  are the matrices of the overlap, kinetic energy and potential energy operators,  $\mathbf{W}$  is the matrix of the relativistic operator  $\frac{1}{4c^2} (\boldsymbol{\sigma} \cdot \mathbf{p}) V(\mathbf{r}) (\boldsymbol{\sigma} \cdot \mathbf{p})$ . The relativistic transformation matrix  $\mathbf{X}$  can be obtained either directly, e.g., by solving Eq. (S1) first and then inverting Eq. (S2) [J. Chem. Phys. 106, 9618, 1997; J. Chem. Phys. 126, 064102, 2007; J. Chem. Theory Comput. 8, 875, 2012], or by a number of iterative techniques [J. Chem. Phys. 106, 9618, 1997; Theor. Chem. Acc. 117, 333, 2007; Theor. Chem. Acc. 130, 633, 2011].

In the case of many-electron systems, the effect of relativity on the electron-electron repulsion integrals is typically ignored and the relativistically corrected one-electron Hamiltonian  $\mathbf{H}^{\text{X2C}}$  is employed in connection with the non-relativistic many-electron formalism [J. Chem. Phys. 106, 9618, 1997; J. Comp. Chem. 23, 786, 2002; J. Chem. Phys. 131, 031104, 2009]. This requires renormalisation of the relativistic Hamiltonian in Eq. (S3) on the non-relativistic metric  $\mathbf{S}$ , which is carried out by

$$\mathbf{H}^{\text{X2C}} = \mathbf{R}^\dagger \tilde{\mathbf{L}} \mathbf{R} , \quad (\text{S6})$$

with the renormalization matrix given by [J. Chem. Phys. 131, 031104, 2009]

$$\mathbf{R} = (\tilde{\mathbf{S}}^{-1} \mathbf{S})^{1/2} = \mathbf{S}^{-1/2} (\mathbf{S}^{-1/2} \tilde{\mathbf{S}} \mathbf{S}^{-1/2})^{-1/2} \mathbf{S}^{1/2} . \quad (\text{S7})$$

Within the one-electron (1e) approximation, the Fock matrix is given by

$$\mathbf{F}^{\text{X2C}} = \mathbf{H}^{\text{X2C}} + (\mathcal{J} - \mathcal{K}) \quad (\text{S8})$$

and the total electronic energy of the X2C Hartree-Fock (HF) or the X2C Kohn-Sham (KS) method is calculated as

$$E^{\text{X2C}} = \text{tr} \mathbf{P} \mathbf{H}^{\text{X2C}} + \frac{1}{2} \text{tr} \mathbf{P} (\mathcal{J} - \mathcal{K}) , \quad (\text{S9})$$

$$\mathbf{P} = \mathbf{C} \mathbf{n} \mathbf{C}^\dagger , \quad (\text{S10})$$

where  $\mathcal{J}$  and  $\mathcal{K}$  are the matrices of the Coulomb and the exchange operators,  $\mathbf{P}$  is the density matrix, and  $\mathbf{C}$  and  $\mathbf{n}$  collect molecular orbital coefficients and occupation numbers, respectively. If contracted basis functions are used,  $\mathbf{H}^{\text{X2C}}$  in Eq. (S9) has to be replaced by  $\mathcal{H}^{\text{X2C}} = \mathcal{C}^\dagger \mathbf{H}^{\text{X2C}} \mathcal{C}$  where  $\mathcal{C}$  collects the contraction coefficients.

Although the simplest 1e approximation to X2C was introduced above, the relativistic two-electron contributions can also be incorporated into X2C as well [Phys. Rep. 537, 59, 2014; J. Chem. Phys. 152, 180901, 2020].

Taking the derivative of the electronic energy in Eq. (S9) with respect to  $\boldsymbol{\mu}$ , where  $\boldsymbol{\mu}$  can be a nuclear coordinate, a component of the electric field, etc., one obtains

$$E_\mu^{\text{X2C}} = \text{tr} \mathbf{P} \mathbf{H}_\mu^{\text{X2C}} + \text{tr} \boldsymbol{\Omega} \mathbf{S}_\mu + \frac{1}{2} \text{tr} \mathbf{P} (\mathcal{J} - \mathcal{K})_{\mu'} . \quad (\text{S11})$$

Here,  $\boldsymbol{\Omega}$  is the energy-weighted density matrix and the prime at  $\mu'$  implies that only the two-electron integrals rather than the density matrix need to be differentiated. In Eq. (S11), only the first term on the right-hand side is different from the non-relativistic counterpart.

## 2 Effective contact density and contact density

For a series of selected neutral atoms, the (effective) contact densities have been calculated at the 4c-Dirac/PBE0 level of theory by DIRAC. The used basis set is Dyal’s VTZ in the fully uncontracted form; for  $Z_A \geq 52$  (Te) the basis functions are augmented by two tight  $s$ -functions and two tight  $p$ -functions (see Table S1). For  $Z_A = 120$  (Ubn), the 37s34p14d7f primitive functions are taken from [Phys. Rev. A 2019, 99, 032509] and then augmented by 5d3f4g functions generated by the same formula.

Table S1: Augmented steep  $sp$ -functions for Dyal’s VTZ basis set

| $Z_A$    | $\alpha_s^{(1)}$ | $\alpha_s^{(2)}$ | $\alpha_p^{(1)}$ | $\alpha_p^{(2)}$ |
|----------|------------------|------------------|------------------|------------------|
| 52 (Te)  | 1689533095.97318 | 326697399.67811  | 56152304.27179   | 18911298.82774   |
| 56 (Ba)  | 1636418314.74528 | 317058973.26979  | 77312232.25183   | 26840432.47170   |
| 70 (Yb)  | 1471705634.19654 | 283995415.70922  | 123968963.98426  | 47389003.17764   |
| 80 (Hg)  | 1387359534.19698 | 265526893.25905  | 150264660.70268  | 62603502.62282   |
| 88 (Ra)  | 1312197346.81460 | 251510427.78891  | 192319104.72396  | 97069967.65813   |
| 102 (No) | 1232778360.37081 | 237305998.42427  | 193800567.35591  | 105887155.79496  |
| 112 (Cn) | 1177648003.14108 | 227881680.34238  | 193370401.96021  | 111623241.44033  |

The (effective) contact densities and their ratios ( $\rho_A^c/\rho_A^e = 1 + \epsilon_A + \zeta_A$ ) are listed in Table S2, where  $\epsilon_A$  is solely determined by  $Z_A$  at a given level of theory and  $\zeta_A$  is much smaller than  $\epsilon_A$  (see Table S4 below, for example), depending on physical and chemical environments, nuclear radii of isotopes, and so on.

Table S2: Contact densities, effective densities, and ratios of neutral atoms

| $Z_A$ | $\rho_A^c$ (bohr $^{-3}$ ) | $\rho_A^e$ (bohr $^{-3}$ ) | ratio  | $Z_A$ | $\rho_A^c$ (bohr $^{-3}$ ) | $\rho_A^e$ (bohr $^{-3}$ ) | ratio  |
|-------|----------------------------|----------------------------|--------|-------|----------------------------|----------------------------|--------|
| 1     | 0.3124                     | 0.3124                     | 1.0000 | 38    | 60703.2579                 | 59460.6827                 | 1.0209 |
| 4     | 35.4428                    | 35.4426                    | 1.0000 | 43    | 99842.6877                 | 97191.3356                 | 1.0273 |
| 8     | 315.2035                   | 315.1973                   | 1.0000 | 48    | 159067.3569                | 153802.7729                | 1.0342 |
| 12    | 1138.6792                  | 1138.5415                  | 1.0001 | 49    | 174273.7084                | 168271.3806                | 1.0357 |
| 14    | 1870.9854                  | 1870.5615                  | 1.0002 | 50    | 190491.0267                | 183654.9504                | 1.0372 |
| 16    | 2885.8513                  | 2884.7476                  | 1.0004 | 51    | 208359.7059                | 200585.8934                | 1.0388 |
| 18    | 4245.1813                  | 4242.4403                  | 1.0006 | 52    | 228555.2054                | 218346.4871                | 1.0468 |
| 19    | 5135.1895                  | 5125.6759                  | 1.0019 | 56    | 324035.9250                | 307392.2509                | 1.0541 |
| 20    | 6103.5466                  | 6089.0573                  | 1.0024 | 70    | 1043024.7202               | 961683.8690                | 1.0846 |
| 25    | 13044.6793                 | 12975.6159                 | 1.0053 | 80    | 2360932.3836               | 2125511.1163               | 1.1108 |
| 30    | 24872.9703                 | 24644.6238                 | 1.0093 | 88    | 4553585.5301               | 4014369.4689               | 1.1343 |
| 34    | 39447.7125                 | 38915.4016                 | 1.0137 | 102   | 14953926.4084              | 12651871.4347              | 1.1820 |
| 35    | 44055.1015                 | 43415.6544                 | 1.0147 | 112   | 36379325.3833              | 29792102.0191              | 1.2211 |
| 36    | 49031.2513                 | 48262.0252                 | 1.0159 | 120   | 76838820.9548              | 61071113.0179              | 1.2582 |
| 37    | 54695.9774                 | 53651.0535                 | 1.0195 |       |                            |                            |        |

For neutral atoms (letting  $\zeta_A = 0$  in this case),  $\epsilon_A$  may be fitted as a function of  $Z_A$

$$\epsilon_A = \begin{cases} p_1(Z_A - 1)^2 + p_2(Z_A - 1)^4 & Z_A \in [1, 18] \\ p_1 Z_A + p_2 Z_A^2 & Z_A \in [19, 120] \end{cases} \quad (\text{S12})$$

where the fitting parameters  $p_1$  and  $p_2$  have been listed in Table S3. The calculated and fitted  $\epsilon_A$  values are plotted in Figure S2. Using Eq. (S12), effective densities may be estimated approximately by scaling contact densities.

Table S3: Fitting parameters in Eq. (S12)

| $Z_A$  | $p_1$                     | $p_2$                    |
|--------|---------------------------|--------------------------|
| 1-18   | $3.50354 \times 10^{-8}$  | $7.54571 \times 10^{-9}$ |
| 19-36  | $-2.89331 \times 10^{-4}$ | $2.02493 \times 10^{-5}$ |
| 37-51  | $-7.77268 \times 10^{-5}$ | $1.64565 \times 10^{-5}$ |
| 52-120 | $-6.19084 \times 10^{-5}$ | $1.82206 \times 10^{-5}$ |

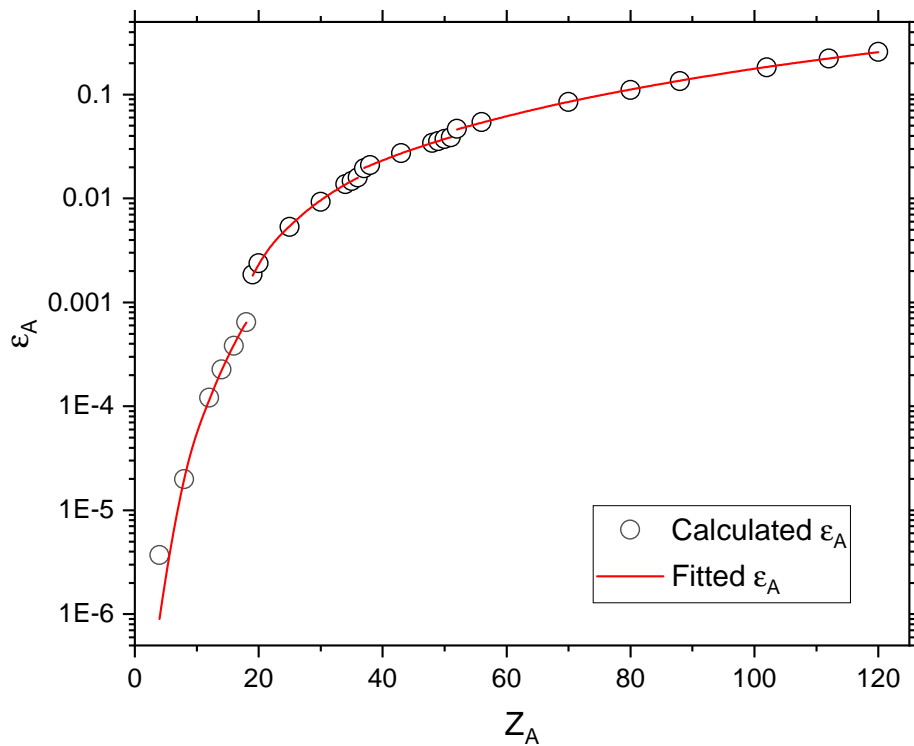

Figure S1: Calculated and fitted  $\epsilon_A$  values relative to  $Z_A$ .

For a series of Cn ( $Z_A = 112$ ) containing systems, the (effective) contact densities and ratios are calculated at the X2C/PBE0 level, where  $\epsilon_A \approx 0.2224$  for the neutral Cn atom and the  $\zeta_A$  values are listed in Table S4.

Table S4: (Effective) contact densities and  $\zeta_A$  values of Cn

|          | $r_e$ (Å) | $\rho_A^c$ (bohr $^{-3}$ ) | $\rho_A^e$ (bohr $^{-3}$ ) | $10^8 \times \zeta_A$ |
|----------|-----------|----------------------------|----------------------------|-----------------------|
| Cn       |           | 36524922.21                | 29879227.13                | 0                     |
| CnF      | 2.108     | 36524880.87                | 29879193.55                | -0.99                 |
| CnF $^+$ | 1.854     | 36524735.79                | 29879075.08                | -1.87                 |
| CnF $_2$ | 1.926     | 36524549.15                | 29878922.85                | -3.73                 |
| CnF $_4$ | 1.929     | 36524181.80                | 29878623.17                | -7.11                 |
| CnO      | 1.863     | 36524967.49                | 29879264.55                | -1.56                 |
| CnO $_2$ | 1.830     | 36524976.17                | 29879271.90                | -2.58                 |

### 3 One-particle density matrices of advanced ab initio methods

Table S5: One-particle (relaxed) density matrices of advanced ab initio methods to generate natural orbitals

| ab initio Method                                | Reference | Note                                            |
|-------------------------------------------------|-----------|-------------------------------------------------|
| (SA-)MCSCF, (SA-)CASSCF                         | [a]       | Eq. (7)                                         |
|                                                 | [b]       | Eq. (31)                                        |
| (ic-)CASPT2                                     | [c]       | Appendix A                                      |
| (ic-)MR-CISD, (ic-)MR-AQCC                      | [d]       | Eqs. (70-72)                                    |
|                                                 | [e]       | see the discussion after Eq. (46)               |
| CCSD                                            | [f]       | Eqs. (A20-A22)                                  |
|                                                 | [g]       | Eqs. (28,29,51)                                 |
| CCSD(T)                                         | [h]       | Eqs. (8,9,15,16)                                |
|                                                 | [i]       | Eqs. (7,8,27)                                   |
| MP2, MP3, MP4, CCSDT                            | [j]       |                                                 |
| RI-(SCS-)MP2                                    | [k]       | Eqs. (6-10)                                     |
| <sup>a)</sup> J. Chem. Phys. 150, 194106, 2019. |           | <sup>b)</sup> J. Chem. Phys. 152, 074102, 2020. |
| <sup>c)</sup> J. Chem. Phys. 119, 5044, 2003.   |           | <sup>d)</sup> J. Chem. Phys. 89, 5803, 1988.    |
| <sup>e)</sup> Mol. Phys. 100, 1647, 2002.       |           | <sup>f)</sup> J. Chem. Phys. 87, 5361, 1987.    |
| <sup>g)</sup> J. Chem. Phys. 95, 2623, 1991.    |           | <sup>h)</sup> J. Chem. Phys. 94, 442, 1991.     |
| <sup>i)</sup> Chem. Phys. Lett. 200, 1, 1992.   |           | <sup>j)</sup> J. Chem. Phys. 90, 1752, 1989.    |
| <sup>k)</sup> J. Comput. Chem. 28, 839, 2007.   |           |                                                 |

## 4 Atomic density radial distributions of core orbitals

Most of the exchange-correlation (XC) functionals were optimized for the properties of valence electrons whereas their accuracies in core electrons (especially in heavy atoms) are not clear. As an example, the radon atom with 78 core electrons ( $\text{Rn}^{8+}$ ) is calculated by the 22 most common XC functionals, including APF (APFD without dispersion), B3LYP, B3PW91, BHandHLYP, BLYP, BP86, CAM-B3LYP, HCTH407, HSE06, M06, M06-2X, M06-L, M11, MN15, O3LYP, PBE0, SOGGA11X, tHCTH, tHCTHhyb, TPSSh,  $\omega$ B97X ( $\omega$ B97XD without dispersion), and X3LYP.

The scalar relativistic effects are taken into account by the sf-X2C Hamiltonian with the Gaussian-type finite nuclear model (FNM), and the basis set is Sapporo-DKH3-TZP-2012 (contracted with FNM) where the  $s$ -functions are uncontracted and augmented by two tight  $s$ -functions with the exponents 7.195446e+08 and 1.444330e+08. The radial core density distributions ( $\xi(R) = 4\pi R^2 \rho(R)$ ) of  $\text{Rn}^{8+}$  by different functionals are compared with the reference ones by sf-X2C/CCSD(T) natural orbitals without frozen cores, and the relative errors are plotted in Figure S4.

Figure S4 shows that the best three functionals are M06, HSE06, and PBE0 in both the nucleus region ( $R \leq 0.01$  Å) and the core region, and a similar conclusion may be made for other rare gas ions. Among the three functionals, PBE0 has been widely supported by modern quantum chemistry programs.

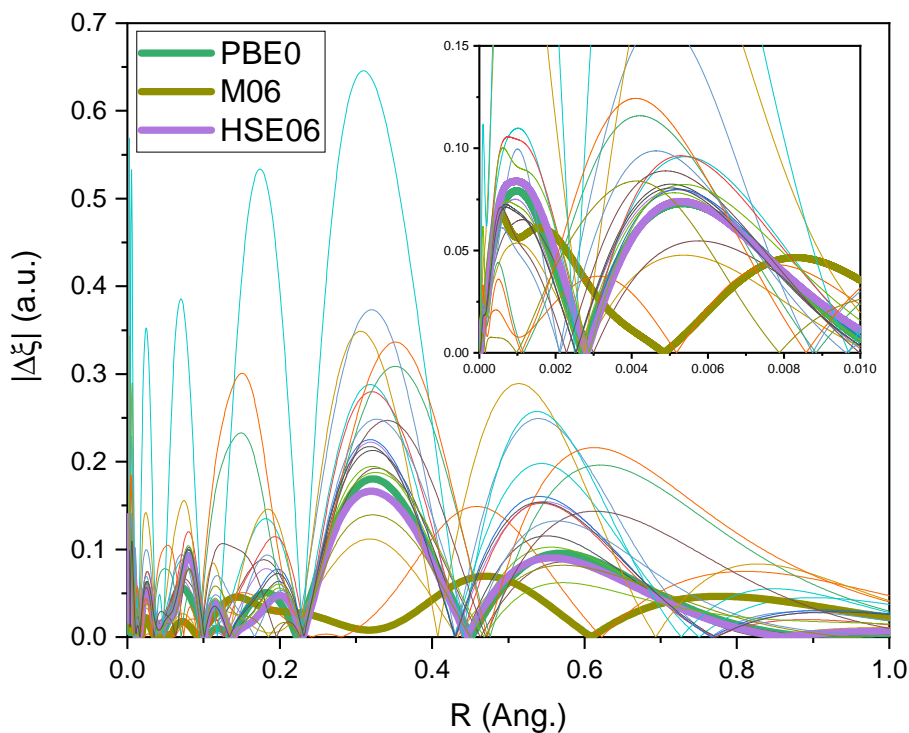

Figure S2: Error of density radial distributions of  $\text{Rn}^{8+}$  by different functionals.

## 5 Results for $^{57}\text{Fe}$

As seen in Table S6, the effective densities of the iron atom may be decomposed into different occupied orbitals or spinors, which are calculated at the levels of non-relativistic HF, sf-X2C/HF, X2C/HF, and 4c-Dirac/HF with Dyllal’s uncontracted VTZ basis set.

The dominant contributions to effective densities come from the  $ns$  ( $ns_{1/2}$ ) shells, but the  $np$  ( $np_{1/2}$ ) shells also contribute to the effective densities significantly due to the relativistic operator  $\frac{1}{4c^2}(\boldsymbol{\sigma} \cdot \mathbf{p})V(\mathbf{r})(\boldsymbol{\sigma} \cdot \mathbf{p})$ . However, the latter contributions are missing in non-relativistic calculations. As pointed by Knecht et. al. [Theor. Chem. Acc. 2011, 129, 631], other shells like  $2p_{3/2}$  and  $3d_{3/2}$  also make tiny contributions to effective densities ( $< 0.001$  bohr $^{-3}$  in the case of Fe).

Table S6: Effective densities (in bohr $^{-3}$ ) in different shells of Fe

| Shell | non-rel. | sf-X2C   | Shell             | X2C      | 4c-Dirac |
|-------|----------|----------|-------------------|----------|----------|
| 1s    | 10722.92 | 13393.64 | 1s <sub>1/2</sub> | 13393.61 | 13384.21 |
| 2s    | 986.27   | 1269.47  | 2s <sub>1/2</sub> | 1269.46  | 1268.83  |
| 2p    | 0.00     | 5.31     | 2p <sub>1/2</sub> | 5.82     | 5.80     |
|       |          |          | 2p <sub>3/2</sub> | 0.00     | 0.00     |
| 3s    | 135.61   | 175.25   | 3s <sub>1/2</sub> | 175.26   | 175.11   |
| 3p    | 0.00     | 0.70     | 3p <sub>1/2</sub> | 0.77     | 0.77     |
|       |          |          | 3p <sub>3/2</sub> | 0.00     | 0.00     |
| 4s    | 3.78     | 4.95     | 4s <sub>1/2</sub> | 4.95     | 4.95     |
| 3d    | 0.00     | 0.00     | 3d <sub>3/2</sub> | 0.00     | 0.00     |
|       |          |          | 3d <sub>5/2</sub> | 0.00     | 0.00     |
| total | 11848.59 | 14849.34 | total             | 14849.86 | 14839.67 |

The effective densities of Fe in some compounds by sf-X2C-AU without or with 1CA are collected in Table S7, in which the natural orbitals are computed at either sf-DKH2/RI-SCS-MP2 or sf-DKH2/ICE-SCF level of theory.

Table S7: Isomer shifts (in mm/s) and effective densities (in bohr $^{-3}$ ) of Fe in selected compounds

| Species                                                      | 2S+1 | Expt. $\delta^{\text{IS}}$ | RI-SCS-MP2 orbitals |          | ICE-SCF orbitals |          | Coordinates |
|--------------------------------------------------------------|------|----------------------------|---------------------|----------|------------------|----------|-------------|
|                                                              |      |                            | sf-X2C-AU           | 1CA      | sf-X2C-AU        | 1CA      |             |
| FeCl <sub>4</sub> <sup>2-</sup>                              | 5    | 0.90                       | 16455.73            | 16455.87 | 16454.57         | 16454.70 | [a]         |
| Fe(CN) <sub>6</sub> <sup>4-</sup>                            | 1    | -0.02                      | 16460.57            | 16460.71 | 16459.88         | 16459.96 | [a]         |
| FeF <sub>6</sub> <sup>4-</sup>                               | 5    | 1.34                       | 16453.87            | 16453.96 | 16452.88         | 16452.96 | [a]         |
| FeCl <sub>4</sub> <sup>-</sup>                               | 6    | 0.19                       | 16459.12            | 16459.28 | 16458.50         | 16458.65 | [a]         |
| Fe(CN) <sub>6</sub> <sup>3-</sup>                            | 2    | -0.13                      | 16460.40            | 16460.54 | 16459.96         | 16460.09 | [a]         |
| FeF <sub>6</sub> <sup>3-</sup>                               | 6    | 0.48                       | 16457.63            | 16457.75 | 16456.84         | 16456.93 | [a]         |
| Fe(H <sub>2</sub> O) <sub>6</sub> <sup>3+</sup>              | 6    | 0.51                       | 16457.93            | 16457.97 | 16457.00         | 16457.01 | [a]         |
| FeO <sub>4</sub> <sup>2-</sup>                               | 3    | -0.87                      | 16463.42            | 16463.81 | 16464.70         | 16465.07 | [a]         |
| Fe(CO) <sub>5</sub>                                          | 1    | -0.18                      | 16460.93            | 16461.19 | 16459.72         | 16460.05 | [a]         |
| FeBr <sub>6</sub> <sup>-</sup>                               | 6    | 0.25                       | 16459.31            | 16459.46 | 16458.80         | 16458.94 | [b]         |
| Fe(H <sub>2</sub> O) <sub>5</sub> NO <sup>2+</sup>           | 4    | 0.76                       | 16456.54            | 16456.64 | 16454.80         | 16454.91 | [c]         |
| FeS <sub>4</sub> C <sub>8</sub> O <sub>4</sub> <sup>2-</sup> | 5    | 0.67                       | 16457.28            | 16457.42 | 16455.66         | 16455.79 | [c]         |

<sup>a)</sup> Inorg. Chem. 48, 784, 2009 by TPSS.

<sup>b)</sup> Inorg. Chim. Acta 337, 181, 2002.

<sup>c)</sup> Inorg. Chem. 48, 9155, 2009.

## 6 Radical density distributions of Hg

At the sf-X2C/HF level, the radical density distributions of occupied shells of the Hg atom are plotted in Figure S3.

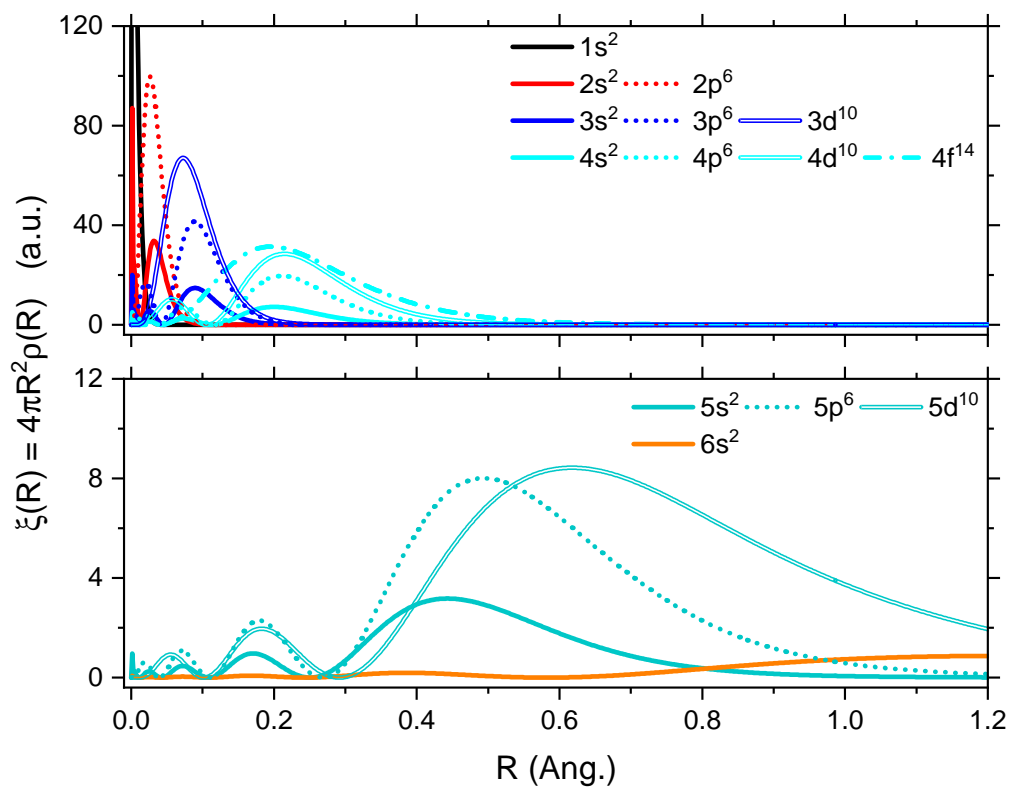

Figure S3: Radical density distributions of Hg.



## 7 About the ReLED program

Molecular orbitals used in the ReLED program may be calculated by the following relativistic Hamiltonians with FNM,

1. sf-X2C

The sf-X2C Hamiltonian with FNM has been implemented in the quantum chemistry programs collected in Table S8, but some of them have not been supported or tested by the ReLED program currently.

2. sf-BSS

The BSS Hamiltonian (also called IOTC or IODKH) is closely related to X2C.

3. sf-DKHn

The low-order Douglas-Kroll-Hess Hamiltonians (e.g. DKH2, DKH3, and DKH4) with FNM may work for the contact density of light atoms before 5d metals, but are not good choices for heavier atoms.

Molecular orbitals with point charge nuclear model (PNM) may also be possible for the calibration procedure, but this has not been fully tested.

Table S8: Quantum chemistry program list with FNM implemented

| Program                | Relativistic Hamiltonian | Data format                  |
|------------------------|--------------------------|------------------------------|
| BAGEL                  | sf-DKH2                  | Molden; to be tested         |
| BDF-G                  | sf-X2C, sf-BSS, sf-DKHn  | Molden                       |
| CFour <sup>a)</sup>    | sf-X2C                   | Molden                       |
| Cologne                | sf-X2C                   | Molden, Fchk <sup>b,c)</sup> |
|                        | X2C                      | Fchk <sup>c)</sup>           |
| Columbus <sup>d)</sup> | sf-X2C, sf-BSS, sf-DKHn  | Molden; to be tested         |
| Dalton                 | sf-DKH2                  | Molden; to be tested         |
| Gaussian               | sf-DKH2                  | Fchk <sup>b,c)</sup>         |
|                        | DKH4                     | Fchk <sup>c)</sup>           |
| (Open)Molcas           | sf-X2C, sf-BSS, sf-DKHn  | Molden; to be tested         |
| Molpro <sup>e)</sup>   | sf-X2C, sf-DKHn          | Molden                       |
| MRCC <sup>f)</sup>     | sf-X2C                   | Molden                       |
| NWChem <sup>g)</sup>   | sf-DKH2, sf-DKH3         | Molden; to be tested         |
| ORCA                   | sf-DKH2                  | Molden                       |
| PySCF                  | sf-X2C                   | Molden; to be tested         |

<sup>a)</sup> Since CFour 2.1.

<sup>b)</sup> Multiwfn is needed to get a Molden file.

<sup>c)</sup> An interface to the Fchk file will be available soon in ReLED.

<sup>d)</sup> Through the interface to (Open)Molcas.

<sup>e)</sup> Since Molpro 2019.

<sup>f)</sup> Through the interface to CFour.

<sup>g)</sup> Since NWChem 7.0.
